# Supplementary material for: Investigating the optimal handling of uncertain pregnancy episodes in the CPRD GOLD Pregnancy Register: a methodological study using UK primary care data
Source: PubMed Central journal article supplement (PMC8867343; doi:10.1136/bmjopen-2021-055773), 2022-02-22
Supplement: bmjopen-2021-055773supp001.pdf [file bmjopen-2021-055773supp001.pdf]

## Appendix

### Appendix 1: Key CPRD GOLD variables

| <i>Column name</i>        | <i>Field name</i> | <i>Description</i>                                                                                                                                                        |
|---------------------------|-------------------|---------------------------------------------------------------------------------------------------------------------------------------------------------------------------|
| Last Collection Date      | lcd               | Date of the last collection for the practice                                                                                                                              |
| Up to Standard Date       | uts               | Date at which the practice data is deemed to be of research quality. Derived using a CPRD algorithm that primarily looks at practice death recording and gaps in the data |
| First Registration Date   | frd               | Date the patient first registered with the practice.                                                                                                                      |
| Current Registration Date | crd               | Date the patient's current period of registration with the practice began.                                                                                                |
| Transfer Out Date         | tod               | Date the patient transferred out of the practice, if relevant. Empty for patients who have not transferred out                                                            |
| Death Date                | deathdate         | Patient's date of death – derived using a CPRD algorithm                                                                                                                  |
| Acceptable Patient Flag   | accept            | Flag to indicate whether the patient has met certain quality standards: 1 = acceptable, 0 = unacceptable                                                                  |
| Event Date                | eventdate         | Date associated with the event, as entered by the GP                                                                                                                      |

|             |         |                                                                                                  |
|-------------|---------|--------------------------------------------------------------------------------------------------|
| System Date | sysdate | The date on which information was entered on to the GP software system (generated automatically) |
|-------------|---------|--------------------------------------------------------------------------------------------------|

**Appendix 2: CPRD Pregnancy Register Variables**

| <i>Field name</i>      | <i>Description</i>                                             |
|------------------------|----------------------------------------------------------------|
| Patid                  | Encrypted unique patient identifier                            |
| Pregid                 | Unique identifier of the pregnancy episode                     |
| Mblbabies              | Number of babies the pregnancy is linked to in the MBL         |
| babypatid <sup>1</sup> | Encrypted unique patient identifier (linked baby)              |
| babymob                | Baby's month of birth as recorded in the baby's medical record |
| babyyob                | Baby's year of birth as recorded in the baby's medical record  |
| totalpregs             | Total number of identified pregnancy episodes (per woman)      |
| pregnumber             | Pregnancy episode number (per woman)                           |
| pregstart              | Estimated start date of pregnancy                              |
| firstantenatal         | Date of earliest antenatal record within the pregnancy         |

### Appendix 3 Example of how a pregnancy may appear in the Register vs GOLD data vs reality

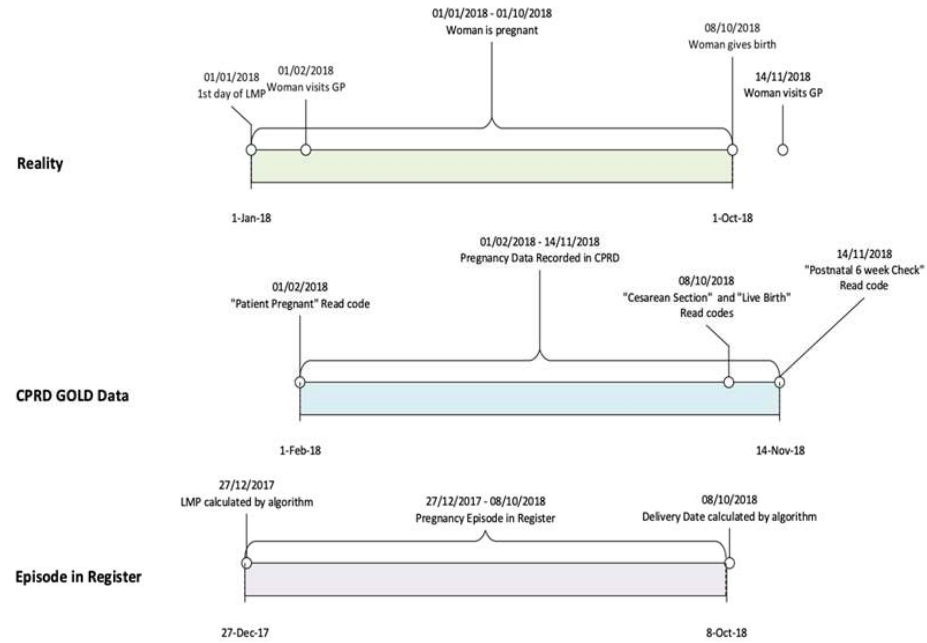

**Appendix 4: ICD codes indicating end of pregnancy**

|       |                                                 |                                                                            |
|-------|-------------------------------------------------|----------------------------------------------------------------------------|
| O00   | Ectopic pregnancy                               |                                                                            |
| O00.0 | Abdominal pregnancy                             |                                                                            |
| O00.1 | Tubal pregnancy                                 |                                                                            |
| O00.2 | Ovarian pregnancy                               |                                                                            |
| O00.8 | Other ectopic pregnancy                         |                                                                            |
| O00.9 | Ectopic pregnancy, unspecified                  |                                                                            |
| O01   | Hydatidiform mole                               |                                                                            |
| O01.0 | Classical hydatidiform mole                     |                                                                            |
| O01.1 | Incomplete and partial hydatidiform mole        |                                                                            |
| O01.9 | Hydatidiform mole, unspecified                  |                                                                            |
| O02   | Other abnormal products of conception           |                                                                            |
| O02.0 | Blighted ovum and nonhydatidiform mole          |                                                                            |
| O02.1 | Missed abortion                                 |                                                                            |
| O02.8 | Other specified abnormal products of conception |                                                                            |
| O02.9 | Abnormal product of conception, unspecified     |                                                                            |
| O03   | Spontaneous abortion                            |                                                                            |
| O03.0 | Spontaneous abortion                            | Incomplete, complicated by genital tract and pelvic infection              |
| O03.1 | Spontaneous abortion                            | Incomplete, complicated by delayed or excessive haemorrhage                |
| O03.2 | Spontaneous abortion                            | Incomplete, complicated by embolism                                        |
| O03.3 | Spontaneous abortion                            | Incomplete, with other and unspecified complications                       |
| O03.4 | Spontaneous abortion                            | Incomplete, without complication                                           |
| O03.5 | Spontaneous abortion                            | Complete or unspecified, complicated by genital tract and pelvic infection |
| O03.6 | Spontaneous abortion                            | Complete or unspecified, complicated by delayed or excessive haemorrhage   |
| O03.7 | Spontaneous abortion                            | Complete or unspecified, complicated by embolism                           |
| O03.8 | Spontaneous abortion                            | Complete or unspecified, with other and unspecified complications          |
| O03.9 | Spontaneous abortion                            | Complete or unspecified, without complication                              |

|       |                      |                                                                            |
|-------|----------------------|----------------------------------------------------------------------------|
| O04   | Medical abortion     |                                                                            |
| O04.0 | Medical abortion     | Incomplete, complicated by genital tract and pelvic infection              |
| O04.1 | Medical abortion     | Incomplete, complicated by delayed or excessive haemorrhage                |
| O04.2 | Medical abortion     | Incomplete, complicated by embolism                                        |
| O04.3 | Medical abortion     | Incomplete, with other and unspecified complications                       |
| O04.4 | Medical abortion     | Incomplete, without complication                                           |
| O04.5 | Medical abortion     | Complete or unspecified, complicated by genital tract and pelvic infection |
| O04.6 | Medical abortion     | Complete or unspecified, complicated by delayed or excessive haemorrhage   |
| O04.7 | Medical abortion     | Complete or unspecified, complicated by embolism                           |
| O04.8 | Medical abortion     | Complete or unspecified, with other and unspecified complications          |
| O04.9 | Medical abortion     | Complete or unspecified, without complication                              |
| O05   | Other abortion       |                                                                            |
| O05.0 | Other abortion       | Incomplete, complicated by genital tract and pelvic infection              |
| O05.1 | Other abortion       | Incomplete, complicated by delayed or excessive haemorrhage                |
| O05.2 | Other abortion       | Incomplete, complicated by embolism                                        |
| O05.3 | Other abortion       | Incomplete, with other and unspecified complications                       |
| O05.4 | Other abortion       | Incomplete, without complication                                           |
| O05.5 | Other abortion       | Complete or unspecified, complicated by genital tract and pelvic infection |
| O05.6 | Other abortion       | Complete or unspecified, complicated by delayed or excessive haemorrhage   |
| O05.7 | Other abortion       | Complete or unspecified, complicated by embolism                           |
| O05.8 | Other abortion       | Complete or unspecified, with other and unspecified complications          |
| O05.9 | Other abortion       | Complete or unspecified, without complication                              |
| O06   | Unspecified abortion |                                                                            |
| O06.0 | Unspecified abortion | Incomplete, complicated by genital tract and pelvic infection              |
| O06.1 | Unspecified abortion | Incomplete, complicated by delayed or excessive haemorrhage                |
| O06.2 | Unspecified abortion | Incomplete, complicated by embolism                                        |
| O06.3 | Unspecified abortion | Incomplete, with other and unspecified complications                       |

|       |                                                                                                    |                                                                            |
|-------|----------------------------------------------------------------------------------------------------|----------------------------------------------------------------------------|
| O06.4 | Unspecified abortion                                                                               | Incomplete, without complication                                           |
| O06.5 | Unspecified abortion                                                                               | Complete or unspecified, complicated by genital tract and pelvic infection |
| O06.6 | Unspecified abortion                                                                               | Complete or unspecified, complicated by delayed or excessive haemorrhage   |
| O06.7 | Unspecified abortion                                                                               | Complete or unspecified, complicated by embolism                           |
| O06.8 | Unspecified abortion                                                                               | Complete or unspecified, with other and unspecified complications          |
| O06.9 | Unspecified abortion                                                                               | Complete or unspecified, without complication                              |
| O07   | Failed attempted abortion                                                                          |                                                                            |
| O07.0 | Failed medical abortion, complicated by genital tract and pelvic infection                         |                                                                            |
| O07.1 | Failed medical abortion, complicated by delayed or excessive haemorrhage                           |                                                                            |
| O07.2 | Failed medical abortion, complicated by embolism                                                   |                                                                            |
| O07.3 | Failed medical abortion, with other and unspecified complications                                  |                                                                            |
| O07.4 | Failed medical abortion, without complication                                                      |                                                                            |
| O07.5 | Other and unspecified failed attempted abortion, complicated by genital tract and pelvic infection |                                                                            |
| O07.6 | Other and unspecified failed attempted abortion, complicated by delayed or excessive haemorrhage   |                                                                            |
| O07.7 | Other and unspecified failed attempted abortion, complicated by embolism                           |                                                                            |
| O07.8 | Other and unspecified failed attempted abortion, with other and unspecified complications          |                                                                            |
| O07.9 | Other and unspecified failed attempted abortion, without complication                              |                                                                            |
| O08   | Complications following abortion and ectopic and molar pregnancy                                   |                                                                            |
| O08.0 | Genital tract and pelvic infection following abortion and ectopic and molar pregnancy              |                                                                            |
| O08.1 | Delayed or excessive haemorrhage following abortion and ectopic and molar pregnancy                |                                                                            |
| O08.2 | Embolism following abortion and ectopic and molar pregnancy                                        |                                                                            |
| O08.3 | Shock following abortion and ectopic and molar pregnancy                                           |                                                                            |
| O08.4 | Renal failure following abortion and ectopic and molar pregnancy                                   |                                                                            |
| O08.5 | Metabolic disorders following abortion and ectopic and molar pregnancy                             |                                                                            |
| O08.6 | Damage to pelvic organs and tissues following abortion and ectopic and molar pregnancy             |                                                                            |
| O08.7 | Other venous complications following abortion and ectopic and molar pregnancy                      |                                                                            |
| O08.8 | Other complications following abortion and ectopic and molar pregnancy                             |                                                                            |
| O08.9 | Complication following abortion and ectopic and molar pregnancy, unspecified                       |                                                                            |

|       |                                                                                             |
|-------|---------------------------------------------------------------------------------------------|
| O60.1 | Preterm spontaneous labour with preterm delivery                                            |
| O60.2 | Preterm spontaneous labour with term delivery                                               |
| O62.3 | Precipitate labour                                                                          |
| O68   | Labour and delivery complicated by fetal stress [distress]                                  |
| O68.0 | Labour and delivery complicated by fetal heart rate anomaly                                 |
| O68.1 | Labour and delivery complicated by meconium in amniotic fluid                               |
| O68.2 | Labour and delivery complicated by fetal heart rate anomaly with meconium in amniotic fluid |
| O68.3 | Labour and delivery complicated by biochemical evidence of fetal stress                     |
| O68.8 | Labour and delivery complicated by other evidence of fetal stress                           |
| O68.9 | Labour and delivery complicated by fetal stress, unspecified                                |
| O69   | Labour and delivery complicated by umbilical cord complications                             |
| O69.0 | Labour and delivery complicated by prolapse of cord                                         |
| O69.1 | Labour and delivery complicated by cord around neck, with compression                       |
| O69.2 | Labour and delivery complicated by other cord entanglement, with compression                |
| O69.3 | Labour and delivery complicated by short cord                                               |
| O69.4 | Labour and delivery complicated by vasa praevia                                             |
| O69.5 | Labour and delivery complicated by vascular lesion of cord                                  |
| O69.8 | Labour and delivery complicated by other cord complications                                 |
| O69.9 | Labour and delivery complicated by cord complication, unspecified                           |



|       |                                                                                   |
|-------|-----------------------------------------------------------------------------------|
| O70   | Perineal laceration during delivery                                               |
| O70.0 | First degree perineal laceration during delivery                                  |
| O70.1 | Second degree perineal laceration during delivery                                 |
| O70.2 | Third degree perineal laceration during delivery                                  |
| O70.3 | Fourth degree perineal laceration during delivery                                 |
| O70.9 | Perineal laceration during delivery, unspecified                                  |
| O74   | Complications of anaesthesia during labour and delivery                           |
| O74.0 | Aspiration pneumonitis due to anaesthesia during labour and delivery              |
| O74.1 | Other pulmonary complications of anaesthesia during labour and delivery           |
| O74.2 | Cardiac complications of anaesthesia during labour and delivery                   |
| O74.3 | Central nervous system complications of anaesthesia during labour and delivery    |
| O74.4 | Toxic reaction to local anaesthesia during labour and delivery                    |
| O74.5 | Spinal and epidural anaesthesia-induced headache during labour and delivery       |
| O74.6 | Other complications of spinal and epidural anaesthesia during labour and delivery |
| O74.7 | Failed or difficult intubation during labour and delivery                         |
| O74.8 | Other complications of anaesthesia during labour and delivery                     |
| O74.9 | Complication of anaesthesia during labour and delivery, unspecified               |
| O75   | Other complications of labour and delivery, not elsewhere classified              |
| O75.0 | Maternal distress during labour and delivery                                      |

|       |                                                                        |
|-------|------------------------------------------------------------------------|
| O75.1 | Shock during or following labour and delivery                          |
| O75.5 | Delayed delivery after artificial rupture of membranes                 |
| O75.6 | Delayed delivery after spontaneous or unspecified rupture of membranes |
| O75.7 | Vaginal delivery following previous caesarean section                  |
| O75.8 | Other specified complications of labour and delivery                   |
| O75.9 | Complication of labour and delivery, unspecified                       |
| O80   | Single spontaneous delivery                                            |
| O80.0 | Spontaneous vertex delivery                                            |
| O80.1 | Spontaneous breech delivery                                            |
| O80.8 | Other single spontaneous delivery                                      |
| O80.9 | Single spontaneous delivery, unspecified                               |
| O81   | Single delivery by forceps and vacuum extractor                        |
| O81.0 | Low forceps delivery                                                   |
| O81.1 | Mid-cavity forceps delivery                                            |
| O81.3 | Other and unspecified forceps delivery                                 |
| O81.4 | Vacuum extractor delivery                                              |
| O81.5 | Delivery by combination of forceps and vacuum extractor                |
| O82   | Single delivery by caesarean section                                   |
| O82.0 | Delivery by elective caesarean section                                 |

|       |                                                                          |
|-------|--------------------------------------------------------------------------|
| O82.1 | Delivery by emergency caesarean section                                  |
| O82.2 | Delivery by caesarean hysterectomy                                       |
| O82.8 | Other single delivery by caesarean section                               |
| O82.9 | Delivery by caesarean section, unspecified                               |
| O83   | Other assisted single delivery                                           |
| O83.0 | Breech extraction                                                        |
| O83.1 | Other assisted breech delivery                                           |
| O83.2 | Other manipulation-assisted delivery                                     |
| O83.4 | Destructive operation for delivery                                       |
| O83.8 | Other specified assisted single delivery                                 |
| O83.9 | Assisted single delivery, unspecified                                    |
| O84   | Multiple delivery                                                        |
| O84.0 | Multiple delivery, all spontaneous                                       |
| O84.1 | Multiple delivery, all by forceps and vacuum extractor                   |
| O84.2 | Multiple delivery, all by caesarean section                              |
| O84.8 | Other multiple delivery                                                  |
| O84.9 | Multiple delivery, unspecified                                           |
| P03   | Fetus and newborn affected by other complications of labour and delivery |
| P03.0 | Fetus and newborn affected by breech delivery and extraction             |

|       |                                                                                                               |
|-------|---------------------------------------------------------------------------------------------------------------|
| P03.1 | Fetus and newborn affected by other malpresentation, malposition and disproportion during labour and delivery |
| P03.2 | Fetus and newborn affected by forceps delivery                                                                |
| P03.3 | Fetus and newborn affected by delivery by vacuum extractor [ventouse]                                         |
| P03.4 | Fetus and newborn affected by caesarean delivery                                                              |
| P03.5 | Fetus and newborn affected by precipitate delivery                                                            |
| P03.8 | Fetus and newborn affected by other specified complications of labour and delivery                            |
| P03.9 | Fetus and newborn affected by complication of labour and delivery, unspecified                                |
| P04.0 | Fetus and newborn affected by maternal anaesthesia and analgesia in pregnancy, labour and delivery            |
| P20.1 | Intrauterine hypoxia first noted during labour and delivery                                                   |
| P61.2 | Anaemia of prematurity                                                                                        |
| Z37   | Outcome of delivery                                                                                           |
| Z37.0 | Single live birth                                                                                             |
| Z37.1 | Single stillbirth                                                                                             |
| Z37.2 | Twins, both liveborn                                                                                          |
| Z37.3 | Twins, one liveborn and one stillborn                                                                         |
| Z37.4 | Twins, both stillborn                                                                                         |
| Z37.5 | Other multiple births, all liveborn                                                                           |
| Z37.6 | Other multiple births, some liveborn                                                                          |
| Z37.7 | Other multiple births, all stillborn                                                                          |

|       |                                                  |
|-------|--------------------------------------------------|
| Z38   | Liveborn infants according to place of birth     |
| Z38.0 | Singleton, born in hospital                      |
| Z38.1 | Singleton, born outside hospital                 |
| Z38.2 | Singleton, unspecified as to place of birth      |
| Z38.3 | Twin, born in hospital                           |
| Z38.4 | Twin, born outside hospital                      |
| Z38.5 | Twin, unspecified as to place of birth           |
| Z38.6 | Other multiple, born in hospital                 |
| Z38.7 | Other multiple, born outside hospital            |
| Z38.8 | Other multiple, unspecified as to place of birth |
| Z39.0 | Care and examination immediately after delivery  |

**Appendix 5: OPCS codes indicating end of pregnancy**

| OPCS |                                                   |                                                              |
|------|---------------------------------------------------|--------------------------------------------------------------|
| P141 | INCISION OF INTROITUS OF VAGINA                   | POSTERIOR EPISIOTOMY AND DIVISION OF LEVATOR ANI MUSCLE      |
| P142 | INCISION OF INTROITUS OF VAGINA                   | POSTERIOR EPISIOTOMY NEC                                     |
| P143 | INCISION OF INTROITUS OF VAGINA                   | ANTERIOR EPISIOTOMY                                          |
| Q101 | CURETTAGE OF UTERUS                               | DILATION OF CERVIX UTERI AND CURETTAGE OF PRODUCTS OF CONCEP |
| Q102 | CURETTAGE OF UTERUS                               | CURETTAGE OF PRODUCTS OF CONCEPTION FROM UTERUS NEC          |
| Q111 | OTHER EVACUATION OF CONTENTS OF UTERUS            | VACUUM ASPIRATION OF PRODUCTS OF CONCEPTION FROM UTERUS NEC  |
| Q112 | OTHER EVACUATION OF CONTENTS OF UTERUS            | DILATION OF CERVIX UTERI AND EVACUATION OF PRODUCTS OF CONCE |
| Q113 | OTHER EVACUATION OF CONTENTS OF UTERUS            | EVACUATION OF PRODUCTS OF CONCEPTION FROM UTERUS NEC         |
| Q115 | OTHER EVACUATION OF CONTENTS OF UTERUS            | VACUUM ASPIRATION/PRODUCTS OF CONCEPTION/UTERUS USING RIGID  |
| Q116 | OTHER EVACUATION OF CONTENTS OF UTERUS            | VACUUM ASPIRATION/PRODUCTS OF CONCEPTION/UTERUS USING FLEXI  |
| Q141 | INTRODUCTION OF ABORTIFACIENT INTO UTERINE CAVITY | INTRA-AMNIOTIC INJECTION OF PROSTAGLANDIN                    |
| Q142 | INTRODUCTION OF ABORTIFACIENT INTO UTERINE CAVITY | INTRA-AMNIOTIC INJECTION OF ABORTIFACIENT NEC                |
| Q143 | INTRODUCTION OF ABORTIFACIENT INTO UTERINE CAVITY | EXTRA-AMNIOTIC INJECTION OF PROSTAGLANDIN                    |
| Q144 | INTRODUCTION OF ABORTIFACIENT INTO UTERINE CAVITY | EXTRA-AMNIOTIC INJECTION OF ABORTIFACIENT NEC                |
| Q145 | INTRODUCTION OF ABORTIFACIENT INTO UTERINE CAVITY | INSERTION OF PROSTAGLANDIN PESSARY                           |

|      |                                                   |                                                   |
|------|---------------------------------------------------|---------------------------------------------------|
| Q146 | INTRODUCTION OF ABORTIFACIENT INTO UTERINE CAVITY | INSERTION OF ABORTIFACIENT PESSARY NEC            |
| Q148 | INTRODUCTION OF ABORTIFACIENT INTO UTERINE CAVITY | OTHER SPECIFIED                                   |
| Q149 | INTRODUCTION OF ABORTIFACIENT INTO UTERINE CAVITY | UNSPECIFIED                                       |
| R031 | SELECTIVE DESTRUCTION OF FETUS                    | EARLY SELECTIVE FETICIDE                          |
| R032 | SELECTIVE DESTRUCTION OF FETUS                    | LATE SELECTIVE FETICIDE                           |
| R038 | SELECTIVE DESTRUCTION OF FETUS                    | OTHER SPECIFIED                                   |
| R039 | SELECTIVE DESTRUCTION OF FETUS                    | UNSPECIFIED                                       |
| R141 | SURGICAL INDUCTION OF LABOUR                      | FOREWATER RUPTURE OF AMNIOTIC MEMBRANE            |
| R142 | SURGICAL INDUCTION OF LABOUR                      | HINDWATER RUPTURE OF AMNIOTIC MEMBRANE            |
| R148 | SURGICAL INDUCTION OF LABOUR                      | OTHER SPECIFIED                                   |
| R149 | SURGICAL INDUCTION OF LABOUR                      | UNSPECIFIED                                       |
| R151 | OTHER INDUCTION OF LABOUR                         | MEDICAL INDUCTION OF LABOUR                       |
| R158 | OTHER INDUCTION OF LABOUR                         | OTHER SPECIFIED                                   |
| R159 | OTHER INDUCTION OF LABOUR                         | UNSPECIFIED                                       |
| R171 | ELECTIVE CAESAREAN DELIVERY                       | ELECTIVE UPPER UTERINE SEGMENT CAESAREAN DELIVERY |
| R172 | ELECTIVE CAESAREAN DELIVERY                       | ELECTIVE LOWER UTERINE SEGMENT CAESAREAN DELIVERY |
| R178 | ELECTIVE CAESAREAN DELIVERY                       | OTHER SPECIFIED                                   |
| R179 | ELECTIVE CAESAREAN DELIVERY                       | UNSPECIFIED                                       |
| R181 | OTHER CAESAREAN DELIVERY                          | UPPER UTERINE SEGMENT CAESAREAN DELIVERY NEC      |
| R182 | OTHER CAESAREAN DELIVERY                          | LOWER UTERINE SEGMENT CAESAREAN DELIVERY NEC      |
| R188 | OTHER CAESAREAN DELIVERY                          | OTHER SPECIFIED                                   |
| R189 | OTHER CAESAREAN DELIVERY                          | UNSPECIFIED                                       |

|      |                                                         |                                                              |
|------|---------------------------------------------------------|--------------------------------------------------------------|
| R191 | BREECH EXTRACTION DELIVERY                              | BREECH EXTRACTION DELIVERY WITH VERSION                      |
| R198 | BREECH EXTRACTION DELIVERY                              | OTHER SPECIFIED                                              |
| R199 | BREECH EXTRACTION DELIVERY                              | UNSPECIFIED                                                  |
| R201 | OTHER BREECH DELIVERY                                   | SPONTANEOUS BREECH DELIVERY                                  |
| R202 | OTHER BREECH DELIVERY                                   | ASSISTED BREECH DELIVERY                                     |
| R208 | OTHER BREECH DELIVERY                                   | OTHER SPECIFIED                                              |
| R209 | OTHER BREECH DELIVERY                                   | UNSPECIFIED                                                  |
| R211 | FORCEPS CEPHALIC DELIVERY                               | HIGH FORCEPS CEPHALIC DELIVERY WITH ROTATION                 |
| R212 | FORCEPS CEPHALIC DELIVERY                               | HIGH FORCEPS CEPHALIC DELIVERY NEC                           |
| R213 | FORCEPS CEPHALIC DELIVERY                               | MID FORCEPS CEPHALIC DELIVERY WITH ROTATION                  |
| R214 | FORCEPS CEPHALIC DELIVERY                               | MID FORCEPS CEPHALIC DELIVERY NEC                            |
| R215 | FORCEPS CEPHALIC DELIVERY                               | LOW FORCEPS CEPHALIC DELIVERY                                |
| R218 | FORCEPS CEPHALIC DELIVERY                               | OTHER SPECIFIED                                              |
| R219 | FORCEPS CEPHALIC DELIVERY                               | UNSPECIFIED                                                  |
| R221 | VACUUM DELIVERY                                         | HIGH VACUUM DELIVERY                                         |
| R222 | VACUUM DELIVERY                                         | LOW VACUUM DELIVERY                                          |
| R223 | VACUUM DELIVERY                                         | VACUUM DELIVERY BEFORE FULL DILATION OF CERVIX               |
| R228 | VACUUM DELIVERY                                         | OTHER SPECIFIED                                              |
| R229 | VACUUM DELIVERY                                         | UNSPECIFIED                                                  |
| R231 | CEPHALIC VAGINAL DELIVERY WITH ABNORMAL PRESENTATION OF | MANIPULATIVE CEPHALIC VAGINAL DELIVERY WITH ABNORMAL PRESENT |
| R232 | CEPHALIC VAGINAL DELIVERY WITH ABNORMAL PRESENTATION OF | NON-MANIPULATIVE CEPHALIC VAGINAL DELIVERY WITH ABNORMAL PRE |
| R238 | CEPHALIC VAGINAL DELIVERY WITH ABNORMAL PRESENTATION OF | OTHER SPECIFIED                                              |



|      |                                                         |                                                  |
|------|---------------------------------------------------------|--------------------------------------------------|
| R239 | CEPHALIC VAGINAL DELIVERY WITH ABNORMAL PRESENTATION OF | UNSPECIFIED                                      |
| R249 | NORMAL DELIVERY                                         | ALL                                              |
| R251 | OTHER METHODS OF DELIVERY                               | CAESAREAN HYSTERECTOMY                           |
| R252 | OTHER METHODS OF DELIVERY                               | DESTRUCTIVE OPERATION TO FACILITATE DELIVERY     |
| R258 | OTHER METHODS OF DELIVERY                               | OTHER SPECIFIED                                  |
| R259 | OTHER METHODS OF DELIVERY                               | UNSPECIFIED                                      |
| R271 | OTHER OPERATIONS TO FACILITATE DELIVERY                 | EPISIOTOMY TO FACILITATE DELIVERY                |
| R278 | OTHER OPERATIONS TO FACILITATE DELIVERY                 | OTHER SPECIFIED                                  |
| R279 | OTHER OPERATIONS TO FACILITATE DELIVERY                 | UNSPECIFIED                                      |
| R281 | INSTRUMENTAL REMOVAL/PRODUCTS/CONCEPTION FROM DEL.UTERU | CURETTAGE OF DELIVERED UTERUS                    |
| R288 | INSTRUMENTAL REMOVAL/PRODUCTS/CONCEPTION FROM DEL.UTERU | OTHER SPECIFIED                                  |
| R289 | INSTRUMENTAL REMOVAL/PRODUCTS/CONCEPTION FROM DEL.UTERU | UNSPECIFIED                                      |
| R291 | MANUAL REMOVAL/PRODUCTS/CONCEPTION FROM DELIVERED UTERU | MANUAL REMOVAL OF PLACENTA FROM DELIVERED UTERUS |
| R298 | MANUAL REMOVAL/PRODUCTS/CONCEPTION FROM DELIVERED UTERU | OTHER SPECIFIED                                  |
| R299 | MANUAL REMOVAL/PRODUCTS/CONCEPTION FROM DELIVERED UTERU | UNSPECIFIED                                      |

|      |                                      |                                                              |
|------|--------------------------------------|--------------------------------------------------------------|
| R301 | OTHER OPERATIONS ON DELIVERED UTERUS | REPOSITIONING OF INVERTED DELIVERED UTERUS                   |
| R302 | OTHER OPERATIONS ON DELIVERED UTERUS | EXPRESSION OF PLACENTA                                       |
| R303 | OTHER OPERATIONS ON DELIVERED UTERUS | INSTRUMENTAL EXPLORATION OF DELIVERED UTERUS NEC             |
| R304 | OTHER OPERATIONS ON DELIVERED UTERUS | MANUAL EXPLORATION OF DELIVERED UTERUS NEC                   |
| R308 | OTHER OPERATIONS ON DELIVERED UTERUS | OTHER SPECIFIED                                              |
| R309 | OTHER OPERATIONS ON DELIVERED UTERUS | UNSPECIFIED                                                  |
| R321 | REPAIR OF OBSTETRIC LACERATION       | REPAIR OF OBSTETRIC LACERATION OF UTERUS OR CERVIX UTERI     |
| R322 | REPAIR OF OBSTETRIC LACERATION       | REPAIR OF OBSTETRIC LACERATION OF PERINEUM AND SPHINCTER     |
| R323 | REPAIR OF OBSTETRIC LACERATION       | REPAIR OF OBSTETRIC LACERATION OF VAGINA AND FLOOR OF PELVIS |
| R324 | REPAIR OF OBSTETRIC LACERATION       | REPAIR OF MINOR OBSTETRIC LACERATION                         |
| R325 | REPAIR OF OBSTETRIC LACERATION       | REPAIR OBSTETRIC LACERATION PERINEUM SPHINCTER MUCOSA ANUS   |
| R328 | REPAIR OF OBSTETRIC LACERATION       | OTHER SPECIFIED                                              |
| R329 | REPAIR OF OBSTETRIC LACERATION       | UNSPECIFIED                                                  |

**Appendix 6: HES Maternity Values to indicate delivery**

| <i>Variable</i> | <i>Definition</i>                                                           | <i>Acceptable values</i> |
|-----------------|-----------------------------------------------------------------------------|--------------------------|
| numbaby         | Number of babies delivered                                                  | 1-4                      |
| delmeth         | Method used to deliver a baby that is a registrable birth                   | 0-9                      |
| delplac         | Actual type of delivery place                                               | 0-8                      |
| delprean        | Anaesthetic or analgesic administered before and during labour and delivery | 1-7                      |
| delposan        | Anaesthetic or analgesic administered after delivery                        | 1-7                      |
| neodur          | Baby's age in days                                                          | >=1                      |
| neocare         | Neonatal level of care                                                      | 0-3                      |
| postdur         | Postnatal days of stay                                                      | >=1                      |

**Appendix 7: Pregnancy Read codes identified as likely to be recorded as useful pregnancy history**

| <b>medcode</b> | <b>read_oxmis_code</b> | <b>read_oxmis_term</b>                             |
|----------------|------------------------|----------------------------------------------------|
| 164            | 635..13                | Premature baby                                     |
| 165            | L04..11                | Miscarriage                                        |
| 255            | L05..12                | Termination of pregnancy                           |
| 364            | 7F13111                | Lower uterine segment caesarean section (LSCS) NEC |
| 618            | L398400                | Delivery by emergency caesarean section            |
| 683            | Q420.00                | Haemolytic disease due to rhesus isoimmunisation   |
| 720            | L398.00                | Caesarean delivery                                 |
| 740            | 7F12.00                | Elective caesarean delivery                        |
| 863            | L398200                | Caesarean section - pregnancy at term              |
| 974            | Q4z..15                | Stillbirth NEC                                     |
| 1413           | L264.00                | Intrauterine death                                 |
| 1492           | L36..00                | Postpartum haemorrhage (PPH)                       |
| 1744           | L03..00                | Ectopic pregnancy                                  |
| 2240           | Q4z..12                | Neonatal death                                     |
| 2638           | L1...00                | Pregnancy complications                            |
| 2639           | E204.11                | Postnatal depression                               |
| 2664           | L180900                | Gestational diabetes mellitus                      |
| 2787           | L11..11                | Antepartum haemorrhage                             |
| 2923           | 62T1.00                | Puerperal depression                               |
| 2924           | 7E06600                | Hysterotomy and termination of pregnancy           |
| 3029           | L166500                | Infections of kidney in pregnancy                  |
| 3085           | 7F12z00                | Elective caesarean delivery NOS                    |
| 3327           | L13..11                | Hyperemesis gravidarum                             |
| 3874           | L031200                | Tubal abortion                                     |
| 4367           | L362.00                | Secondary and delayed postpartum haemorrhage       |
| 4530           | L00..00                | Hydatidiform mole                                  |
| 4607           | L414.00                | Postnatal deep vein thrombosis                     |

|       |         |                                                            |
|-------|---------|------------------------------------------------------------|
| 4638  | 7F13.00 | Other caesarean delivery                                   |
| 4786  | L213200 | Multiple delivery, all by caesarean section                |
| 4979  | Eu53012 | [X]Postpartum depression NOS                               |
| 5113  | L39y411 | Postnatal vaginal discomfort                               |
| 5464  | L11y100 | Other antepartum haemorrhage - delivered                   |
| 7174  | L43..00 | Obstetric pulmonary embolism                               |
| 7670  | L398z00 | Caesarean delivery NOS                                     |
| 7916  | Z254500 | Delivered by caesarean section - pregnancy at term         |
| 8147  | L264.11 | Fetal death in utero                                       |
| 8295  | Q48D100 | [X]Macerated stillbirth                                    |
| 8446  | L180811 | Gestational diabetes mellitus                              |
| 8776  | Q48D.00 | [X] Stillbirth                                             |
| 8906  | ZV27.12 | [V]Stillbirth                                              |
| 9067  | L125.00 | Severe pre-eclampsia                                       |
| 9668  | 7F12100 | Elective lower uterine segment caesarean delivery          |
| 9800  | L398300 | Delivery by elective caesarean section                     |
| 10049 | 7F12111 | Elective lower uterine segment caesarean section (LSCS)    |
| 10278 | L180800 | Diabetes mellitus arising in pregnancy                     |
| 11359 | L180.00 | Diabetes mellitus during pregnancy/childbirth/puerperium   |
| 11947 | L181500 | Postpartum thyroiditis                                     |
| 11986 | 7E13300 | Excision of ruptured ectopic tubal pregnancy               |
| 12090 | L126.00 | Eclampsia                                                  |
| 12118 | 7F13300 | Emergency caesarean section                                |
| 12320 | L09..11 | Complications following abortion/ectopic/molar pregnancies |
| 13307 | Eu53011 | [X]Postnatal depression NOS                                |
| 13584 | 3885    | Edinburgh postnatal depression scale                       |
| 15061 | L13..12 | Hyperemesis of pregnancy                                   |
| 15514 | 7F13000 | Upper uterine segment caesarean delivery NEC               |
| 15533 | L451400 | Obstetric breast abscess with postnatal complication       |

|       |         |                                                              |
|-------|---------|--------------------------------------------------------------|
| 16250 | L414.12 | Phlegmasia alba dolens - obstetric                           |
| 16281 | L45z400 | Obstetric breast infection NOS with postnatal complication   |
| 16321 | L360.00 | Third-stage postpartum haemorrhage                           |
| 17614 | Eu53111 | [X]Puerperal psychosis NOS                                   |
| 17744 | 7F13100 | Lower uterine segment caesarean delivery NEC                 |
| 18258 | L167.00 | Liver disorder in pregnancy                                  |
| 18369 | ZV27100 | [V]Single stillbirth                                         |
| 18702 | 6G00.00 | Postnatal depression counselling                             |
| 18770 | Q20yz13 | Renal injury due to birth trauma                             |
| 18830 | L414.11 | DVT - deep venous thrombosis, postnatal                      |
| 20152 | L090y00 | Sepsis NOS following abortion/ectopic/molar pregnancy        |
| 20165 | L363.00 | Postpartum coagulation defects                               |
| 20307 | L091.00 | Delayed/excessive haemorrhage following abortive pregnancy   |
| 20573 | Q48D000 | [X]Fresh stillbirth                                          |
| 22775 | L11y.00 | Other antepartum haemorrhage                                 |
| 23015 | 6334    | Twins - 1 still + 1 live born                                |
| 23588 | L414200 | Postnatal deep vein thrombosis with postnatal complication   |
| 23642 | Eu53z00 | [X]Puerperal mental disorder, unspecified                    |
| 24089 | L356z00 | Obstetric damage to pelvic joints and ligaments NOS          |
| 24927 | Eu53.00 | [X]Mental and behav disorders assoc with the puerperium NEC  |
| 24951 | L18C.00 | Endocrine nutrition+metab dis complic pregn,childbirth+puerp |
| 25028 | L09z.00 | Complication NOS following abortion/ectopic/molar pregnancy  |
| 25415 | Q411.00 | Perinatal intraventricular haemorrhage                       |
| 28364 | Q420.12 | Rhesus isoimmunisation of the newborn                        |
| 28861 | L398500 | Delivery by caesarean hysterectomy                           |
| 29155 | 7F1A000 | Caesarean hysterectomy                                       |

|       |         |                                                                 |
|-------|---------|-----------------------------------------------------------------|
| 31203 | 6332    | Single stillbirth                                               |
| 31857 | Q204.00 | Spine or spinal cord injury due to birth trauma                 |
| 32950 | L03y100 | Cornual pregnancy                                               |
| 33477 | L398100 | Caesarean delivery - delivered                                  |
| 33724 | L03z.00 | Ectopic pregnancy NOS                                           |
| 34136 | L120z00 | Benign essential hypertension in preg/childb/puerp NOS          |
| 34173 | L12B.00 | Proteinuric hypertension of pregnancy                           |
| 34299 | L240.00 | Congenital abnormality of uterus in preg/childbirth/puerp       |
| 34502 | 6335    | Twins - both still born                                         |
| 34639 | L180100 | Diabetes mellitus during pregnancy - baby delivered             |
| 34868 | L4...00 | Complications of the puerperium                                 |
| 35190 | 7F13z00 | Other caesarean delivery NOS                                    |
| 35309 | 6755    | Post miscarriage counselling                                    |
| 36421 | L167z00 | Liver disorder in pregnancy NOS                                 |
| 37280 | L36z.00 | Postpartum haemorrhage NOS                                      |
| 39117 | L126500 | Eclampsia in pregnancy                                          |
| 40224 | Eu53000 | [X]Mild mental/behav disorder assoc with the puerperium<br>NEC  |
| 40500 | Eu53100 | [X]Severe mental and behav disorder assoc wth<br>puerperium NEC |
| 40730 | L125z00 | Severe pre-eclampsia NOS                                        |
| 42088 | L125100 | Severe pre-eclampsia - delivered                                |
| 42598 | L175.00 | Maternal rubella in pregnancy, childbirth and the<br>puerperium |
| 44494 | L441z00 | Caesarean wound disruption NOS                                  |
| 45806 | L070x00 | Unspecified abortion with complication NOS                      |
| 46756 | L184.00 | Mental disorders in pregnancy, childbirth and the<br>puerperium |
| 47227 | ZV27300 | [V]Twins, one live born and one stillborn                       |
| 47542 | L362200 | Secondary postpartum haemorrhage with postnatal<br>problem      |

|       |         |                                                              |
|-------|---------|--------------------------------------------------------------|
| 47546 | 7F12y00 | Other specified elective caesarean delivery                  |
| 47607 | L440.11 | CVA - cerebrovascular accident in the puerperium             |
| 47686 | L181.00 | Thyroid dysfunction in pregnancy/childbirth/puerperium       |
| 47741 | L127000 | Pre-eclampsia or eclampsia with hypertension unspecified     |
| 47863 | Lyu5200 | [X]Other single delivery by caesarean section                |
| 48500 | Q49..00 | Cardiovascular disorders originating in the perinatal period |
| 49363 | Q200100 | Subdural haemorrhage unspecified, due to birth trauma        |
| 50093 | L093000 | Oliguria following abortive pregnancy                        |
| 52875 | L398000 | Caesarean delivery unspecified                               |
| 52967 | Lyu0B00 | [X]Complic following abortion & ectopic & molar preg, unspec |
| 53141 | L241.00 | Tumour of uterine body in pregnancy/childbirth/puerperium    |
| 54652 | L362z00 | Secondary and delayed postpartum haemorrhage NOS             |
| 55304 | L131z00 | Hyperemesis gravidarum with metabolic disturbance NOS        |
| 56279 | L440.12 | Stroke in the puerperium                                     |
| 57236 | L400200 | Puerperal endometritis with postnatal complication           |
| 58156 | L03y.00 | Other ectopic pregnancy                                      |
| 58982 | L186.00 | Other cardiovascular diseases in pregnancy/childbirth/puerp  |
| 61204 | L414z00 | Postnatal deep vein thrombosis NOS                           |
| 61578 | L441000 | Caesarean wound disruption unspecified                       |
| 62052 | L092500 | Uterus damage following abortive pregnancy                   |
| 62358 | L167000 | Liver disorder in pregnancy unspecified                      |
| 62919 | L125200 | Severe pre-eclampsia - delivered with postnatal complication |
| 63277 | L393.00 | Acute renal failure following labour and delivery            |
| 64127 | L121000 | Renal hypertension in pregnancy/childbirth/puerp unspecified |
| 64384 | L180z00 | Diabetes mellitus in pregnancy/childbirth/puerperium NOS     |
| 66213 | Q20yz12 | Kidney injury due to birth trauma                            |



|        |         |                                                              |
|--------|---------|--------------------------------------------------------------|
| 66594  | L186.11 | Heart disease during pregnancy                               |
| 67006  | L096400 | Pulmonary embolism following abortive pregnancy              |
| 68319  | L351300 | Rupture of uterus during/after labour with postnatal problem |
| 70891  | L126400 | Eclampsia with postnatal complication                        |
| 71314  | L093.00 | Renal failure following abortive pregnancy                   |
| 71717  | L121100 | Renal hypertension in pregnancy/childbirth/puerp - delivered |
| 72215  | L241z00 | Uterine body tumour in pregnancy/childbirth/puerperium NOS   |
| 72230  | L241100 | Tumour of uterine body - baby delivered                      |
| 72458  | L393000 | Post-delivery acute renal failure unspecified                |
| 72513  | 7F13200 | Extraperitoneal caesarean section                            |
| 73407  | L261200 | Rhesus isoimmunisation with antenatal problem                |
| 73617  | L261000 | Rhesus isoimmunisation unspecified                           |
| 73647  | L188000 | Abnormal GTT - unspec whether during pregnancy/puerperium    |
| 86756  | Qyu3600 | [X]Other chronic resp diseases originating/perinatal period  |
| 93710  | Q317y00 | Other specified perinatal chronic respiratory disease        |
| 94718  | L121z00 | Renal hypertension in pregnancy/childbirth/puerperium NOS    |
| 97367  | L43z100 | Obstetric pulmonary embolism NOS - delivered                 |
| 99188  | L173.00 | Maternal tuberculosis in pregnancy/childbirth/puerperium     |
| 103465 | Qyu3B00 | [X]Cardiovasc disord origin in the perinat period, unspecif  |
| 103677 | Eu32B00 | [X]Antenatal depression                                      |
| 110868 | L181000 | Thyroid dysfunction - unspec whether in pregnancy/puerperium |
| 111574 | L114z00 | Antepartum haemorrhage with trauma NOS                       |

**Appendix 8: Antenatal Read codes identified as pregnancy advice codes**

| medcode | read_oxmis_code | read_oxmis_term                                             |
|---------|-----------------|-------------------------------------------------------------|
| 30351   | 67A6.00         | Drugs in pregnancy advice                                   |
| 36903   | 67AZ.00         | Pregnancy advice NOS                                        |
| 102359  | 67AF.00         | Pregnancy advice for patients with epilepsy                 |
| 107892  | 67lu.00         | Advice on risk harm to fetus from maternl medictn dur preg  |
| 110888  | 67lt.00         | Advice on risk harm to mother from maternl medictn dur preg |

|                         |                                                                                                                                                                                                                                                                                                                                                                                                              |
|-------------------------|--------------------------------------------------------------------------------------------------------------------------------------------------------------------------------------------------------------------------------------------------------------------------------------------------------------------------------------------------------------------------------------------------------------|
| startsource             | Data source used to estimate pregnancy start date: 1 = Imputed <sup>2</sup> , 2 = EDD, 3 = LMP, 4 = Gestational age at birth, 5 = Gestational age from antenatal record, 6 = EDC                                                                                                                                                                                                                             |
| startadj                | Flag to indicate whether the pregnancy start date has been adjusted: 0 = Not adjusted, 1 = Due to antenatal records in the preceding 4 weeks, 2 = Due to specific conflicts between the estimated pregnancy duration and records indicating gestational age at birth (live births and stillbirths only), 3 = Both                                                                                            |
| Secondtrim <sup>3</sup> | Estimated start date of second trimester                                                                                                                                                                                                                                                                                                                                                                     |
| Thirdtrim <sup>3</sup>  | Estimated start date of third trimester                                                                                                                                                                                                                                                                                                                                                                      |
| pregend                 | Estimated end date of pregnancy. NB: For pregnancies with unknown outcome, the date of the latest antenatal record in the pregnancy episode is provided.                                                                                                                                                                                                                                                     |
| endsource               | Data source used to estimate pregnancy end date: 1 = Delivery record, 2 = Postnatal record in the mother's medical record, 3 = Discharge date relating to a delivery, 4 = Baby's (month and) year of birth as recorded in the baby's medical record, 5 = Postnatal record in the baby's medical record, 6 = First consultation in the baby's medical record. Only completed for live births and stillbirths. |
| endadj                  | Flag to indicate whether the pregnancy end date has been adjusted: 0 = Not adjusted, 1 = Due to specific conflicts between the estimated pregnancy duration and records indicating gestational age, 2 = Due to prior adjustments to the start date, 3 = Both. Missing for deliveries based on late pregnancy records <sup>4</sup> .                                                                          |
| gestdays                | Estimated duration of pregnancy episode in days (calculated as pregend minus pregstart)                                                                                                                                                                                                                                                                                                                      |

|             |                                                                                                                                                                                                                                                                                                                                |
|-------------|--------------------------------------------------------------------------------------------------------------------------------------------------------------------------------------------------------------------------------------------------------------------------------------------------------------------------------|
| matage      | Mother's age at end of pregnancy (years)                                                                                                                                                                                                                                                                                       |
| outcome     | Outcome of pregnancy: 1 = Live birth, 2 = Stillbirth, 3 = 1 and 2, 4 = Miscarriage, 5 = TOP, 6 = Probable TOP, 7 = Ectopic, 8 = Molar, 9 = Blighted ovum, 10 = Unspecified loss, 11 = Delivery based on a third trimester pregnancy record, 12 = Delivery based on a late pregnancy record <sup>4</sup> , 13 = Outcome unknown |
| preterm_ev  | Flag to indicate evidence of a premature delivery: 1=preterm, 0=no evidence of preterm, 9=not applicable (outcome not a delivery)                                                                                                                                                                                              |
| postterm_ev | Flag to indicate evidence of a post-term delivery: 1=post-term, 0=no evidence of post-term, 9=not applicable (outcome not a delivery)                                                                                                                                                                                          |
| multiple_ev | Flag to indicate evidence of a multiple pregnancy: 1=multiple, 0=no evidence of multiple. Missing for pregnancy losses.                                                                                                                                                                                                        |
| conflict    | Flag to indicate whether the pregnancy episode overlaps with another episode (within a woman): 1=conflicting, 0= non-conflicting                                                                                                                                                                                               |

1 A single babypatid is provided. For multiple pregnancies resulting in >1 liveborn infant (when mblbabies>1), additional babypatids may be retrieved from the MBL.

2 For "Outcome unknown" pregnancies, the imputed start date is obtained by subtracting 4 weeks from the earliest antenatal record in the episode.

3 The timing of trimesters is estimated using a common convention: first trimester (first day of LMP [pregstart] to 13 completed weeks), second (weeks 14 to 26), and third (week 27 to delivery [pregend]).

4 Late pregnancy records refer to the period up to 3 weeks before delivery, e.g. "Baby overdue".

**Appendix 9: Read codes potentially misclassified as antenatal rather than outcomes**

| medcode | read_oxmis_code | read_oxmis_term                                              |
|---------|-----------------|--------------------------------------------------------------|
| 424     | L281.00         | Premature rupture of membranes                               |
| 906     | L100.00         | Threatened abortion                                          |
| 1413    | L264.00         | Intrauterine death                                           |
| 1737    | L02..00         | Missed abortion                                              |
| 1879    | L071.00         | Unspecified abortion incomplete                              |
| 3004    | L14..11         | Premature labour                                             |
| 6730    | L051.12         | Surgical abortion - incomplete                               |
| 7114    | L044.00         | Inevitable abortion incomplete                               |
| 7413    | L041.00         | Spontaneous abortion incomplete                              |
| 8076    | 8H7W.00         | Refer to TOP counselling                                     |
| 8147    | L264.11         | Fetal death in utero                                         |
| 8173    | L043.00         | Inevitable abortion unspecified                              |
| 12241   | L02..11         | Missed miscarriage                                           |
| 12337   | L051.00         | Legal abortion incomplete                                    |
| 17625   | L044.11         | Inevitable miscarriage incomp                                |
| 20621   | ZV25313         | [V]Admission for termination of pregnancy                    |
| 20809   | L14..00         | Early or threatened labour                                   |
| 20933   | 6776            | Preg. termination counselling                                |
| 25883   | L071y00         | Unspecified incomplete abortion + no mention of complication |
| 28605   | L051z00         | Incomplete legal abortion NOS                                |
| 29439   | L041z00         | Incomplete spontaneous abortion NOS                          |
| 33964   | LOA4.00         | Failed medical abortion, without complication                |
| 35184   | L071z00         | Unspecified incomplete abortion NOS                          |
| 35273   | L097.00         | Readmission for abortive pregnancy (NHS codes)               |
| 35701   | L100000         | Threatened abortion unspecified                              |
| 37831   | L264z00         | Intrauterine death NOS                                       |

|        |         |                                                              |
|--------|---------|--------------------------------------------------------------|
| 39754  | L051.11 | Medal abortion - incomplete                                  |
| 41118  | L08z.00 | Failed attempted abortion NOS                                |
| 41783  | L041100 | Incomp spontaneous abortion + delayed/excessive haemorrhage  |
| 47376  | L0A1.00 | Failed medical abortion complic by genital tract/pelvic infn |
| 47435  | L097200 | Readmission for retained produc of concept, illegal abortion |
| 50903  | L0A2.00 | Failed medical abortion comp by delayed/excessive haem'ge    |
| 53201  | ZV25B00 | [V]Admission for administration of abortifacient             |
| 59572  | L0A3.00 | Failed medical abortion, complicated by embolism             |
| 59789  | L14z.00 | Early or threatened labour NOS                               |
| 65716  | Q011.00 | Fetus/neonate affected maternal premature rupture membrane   |
| 68683  | 7E0B.00 | Introduction of abortifacient into uterine cavity            |
| 96418  | L06z.00 | Illegally induced abortion NOS                               |
| 97391  | L281200 | Premature rupture of membranes with antenatal problem        |
| 99205  | 7E0Bz00 | Introduction of abortifacient into uterine cavity NOS        |
| 101959 | 7E0B300 | Extraamniotic injection of abortifacient NEC                 |
| 102362 | 389B.00 | Assessment for termination of pregnancy                      |
| 102494 | 8Hh3.00 | Self referral to termination of pregnancy service            |
| 105048 | 7E0By00 | Introduction of abortifacient into uterine cavity OS         |

## Appendix 10: Outcome Groupings

Pregnancy Outcomes will be grouped together with those pregnancies which would have similar rules applied and combinations of outcome group for each pair will be coded.

| <i>Group</i>         | <i>Pregnancy Register codes</i> | <i>Group</i> |
|----------------------|---------------------------------|--------------|
| Early Pregnancy Loss | 4, 5, 6, 10, 7, 8, 9            | 1            |
| Delivery             | 1, 2, 3, 11, 12                 | 2            |
| Unknown Outcome      | 13                              | 3            |

**Appendix 11: Read Codes identified as likely to only be recorded during current pregnancy**

| medcode | read_oxmis_term                                             |
|---------|-------------------------------------------------------------|
| 30979   | [SO]Fetus                                                   |
| 36441   | [V]Amniocentesis to screen for chromosomal anomalies        |
| 61455   | [V]Amniotic fluid to screen for alphafetoprotein levels     |
| 6298    | [V]Antenatal screening                                      |
| 49665   | [V]Antenatal screening for chromosomal anomalies            |
| 35912   | [V]Pregnancy confirmed                                      |
| 43428   | [V]Screening for fetal growth retardation using ultrasonics |
| 103341  | [V]Screening for isoimmunisation                            |
| 7536    | [V]Screening for malformations using ultrasonics            |
| 13167   | A/N 12 weeks examination                                    |
| 13166   | A/N 16 week examination                                     |
| 29364   | A/N 20 week examination                                     |
| 13169   | A/N 24 week examination                                     |
| 26554   | A/N 28 week examination                                     |
| 29627   | A/N 30 week examination                                     |
| 13171   | A/N 32 week examination                                     |
| 13170   | A/N 34 week examination                                     |
| 29727   | A/N 35 week examination                                     |
| 29610   | A/N 36 week examination                                     |
| 26552   | A/N 37 week examination                                     |
| 26553   | A/N 38 week examination                                     |
| 26551   | A/N 39 week examination                                     |
| 29280   | A/N 40 week examination                                     |
| 37029   | A/N 41 week examination                                     |
| 55605   | A/N 42 week examination                                     |
| 3517    | A/N booking examination                                     |
| 13984   | Antenatal ultrasound confirms ectopic pregnancy             |
| 12260   | A/N Rh antibody screen                                      |



|        |                                                            |
|--------|------------------------------------------------------------|
| 68089  | A/N Rh antibody screen NOS                                 |
| 70616  | A/N sickle cell screen done                                |
| 102099 | A/N sickle cell screen NOS                                 |
| 64141  | A/N syphilis screen-blood sent                             |
| 14086  | A/N U/S scan abnormal                                      |
| 27057  | A/N U/S scan for ? abnormality                             |
| 64537  | A/N U/S scan for slow growth                               |
| 37221  | A/N U/S scan normal +? dates                               |
| 35826  | A/N U/S scan normal += dates                               |
| 106588 | Antenatal 22 week examination                              |
| 106923 | Antenatal 25 week examination                              |
| 106425 | Antenatal 31 week examination                              |
| 13168  | Antenatal examination NOS                                  |
| 10056  | Antenatal examinations                                     |
| 13416  | Antenatal sickle cell screen                               |
| 13417  | Antenatal syphilis screen                                  |
| 42326  | Antenatal syphilis screen NOS                              |
| 13968  | Antenatal ultrasound confirms intra-uterine pregnancy      |
| 2029   | Antenatal ultrasound scan                                  |
| 27056  | Antenatal ultrasound scan at 17-22 weeks                   |
| 39611  | Antenatal ultrasound scan at 22-40 weeks                   |
| 14084  | Antenatal ultrasound scan at 9-16 weeks                    |
| 14083  | Antenatal ultrasound scan NOS                              |
| 14085  | Antenatal ultrasounds scan at 4-8 weeks                    |
| 12890  | Confirmation of pregnancy                                  |
| 50546  | Dating scan                                                |
| 9462   | Dating/booking US scan                                     |
| 100164 | Detailed structural scan                                   |
| 103741 | Doppler ultrasound scan of middle cerebral artery of fetus |
| 102885 | Doppler ultrasound scan of umbilical artery                |
| 95166  | Doppler ultrasound scan of uterine artery                  |
| 46126  | Double test                                                |
| 13414  | Downs screen - blood test                                  |

|        |                                                       |
|--------|-------------------------------------------------------|
| 38358  | Downs screen blood test abnormal                      |
| 34508  | Downs screen blood test normal                        |
| 64832  | Downs screening - blood sent                          |
| 39173  | Downs screening blood test NOS                        |
| 103893 | Fetal ascites scan                                    |
| 19720  | Fetal monitoring                                      |
| 19590  | Fetal movements felt                                  |
| 55493  | Fetal movements seen                                  |
| 53420  | Fetal tachycardia                                     |
| 9164   | Fetal U-S scan                                        |
| 31110  | Fundal height equal to dates                          |
| 25875  | Fundal height high for dates                          |
| 37039  | Fundal height low for dates                           |
| 37038  | Girth of pregnant abdomen                             |
| 91773  | Good baseline variability in fetal heart rate         |
| 105992 | Height of uterine fundus                              |
| 92171  | Mid trimester scan                                    |
| 85992  | Non routine obstetric scan for fetal observations     |
| 95875  | Non routine obstetric scan for fetal observations NOS |
| 38846  | Normal fetal heart baseline pattern                   |
| 13997  | Nuchal scan                                           |
| 95881  | O/E - fetal heart < 40                                |
| 101119 | O/E - fetal heart > 200                               |
| 68996  | O/E - fetal heart 100-120                             |
| 26707  | O/E - fetal heart 120-160                             |
| 62903  | O/E - fetal heart 160-180                             |
| 62898  | O/E - fetal heart 180-200                             |
| 72837  | O/E - fetal heart 40-80                               |
| 70856  | O/E - fetal heart 80-100                              |
| 7681   | O/E - fetal heart heard                               |
| 22815  | O/E - fetal movements                                 |
| 25153  | O/E - fetal movements felt                            |
| 52857  | O/E - fetal movements NOS                             |
| 53687  | O/E - fetal movements seen                            |

|       |                                        |
|-------|----------------------------------------|
| 27801 | O/E - fetal movemnt.diminished         |
| 26710 | O/E - fetal presentation               |
| 67186 | O/E - fetal presentation NOS           |
| 69819 | O/E - fetal station NOS                |
| 24701 | O/E - fetus very active                |
| 26708 | O/E - fundal size = dates              |
| 37049 | O/E - fundus = term size               |
| 26705 | O/E - fundus 12-16 week size           |
| 37051 | O/E - fundus 16-20 week size           |
| 26704 | O/E - fundus 20-24 week size           |
| 26709 | O/E - fundus 24-28 week size           |
| 30802 | O/E - fundus 28-32 week size           |
| 30803 | O/E - fundus 32-34 week size           |
| 26703 | O/E - fundus 34-36 week size           |
| 26706 | O/E - fundus 36-38 week size           |
| 13318 | O/E - fundus size - obstetric          |
| 30804 | O/E - gravid uterus size               |
| 62897 | O/E - gravid uterus size NOS           |
| 37180 | O/E - lie of fetus                     |
| 29788 | O/E - multiple presentation            |
| 63024 | O/E -fetal presentation unsure         |
| 37050 | O/E -fundus 38 weeks-term size         |
| 49519 | Observation of position of pregnancy   |
| 12625 | Obstetric monitoring                   |
| 44173 | Obstetric X-ray - fetus                |
| 56727 | Obstetric X-ray - placenta             |
| 85951 | Other non routine obstetric scan NOS   |
| 96343 | Other specified routine obstetric scan |
| 13165 | Patient currently pregnant             |
| 127   | Patient pregnant                       |
| 14899 | Patient pregnant NOS                   |
| 38669 | Placenta U-S scan                      |
| 9986  | Pregnancy care                         |
| 4536  | Pregnancy confirmed                    |

|        |                                           |
|--------|-------------------------------------------|
| 15338  | Pregnancy unplanned ? wanted              |
| 14877  | Pregnant - ? planned                      |
| 30817  | Pregnant - blood test confirms            |
| 51298  | Pregnant - on abdom. palpation            |
| 20240  | Pregnant - planned                        |
| 16215  | Pregnant - urine test confirms            |
| 35592  | Pregnant - V.E. confirms                  |
| 10173  | Pregnant abdomen observation              |
| 15567  | Pregnant -unplanned-not wanted            |
| 107698 | Pregnant uterus displaced laterally       |
| 32975  | Pregnant, diaphragm failure               |
| 29692  | Pregnant, IUD failure                     |
| 14994  | Pregnant, sheath failure                  |
| 11989  | Referral for termination of pregnancy     |
| 2278   | Requests pregnancy termination            |
| 69815  | Rh screen - 1st preg. sample              |
| 29623  | Rh screen - 2nd preg. sample              |
| 109416 | Rh screen - 3rd preg. sample              |
| 93946  | Rhesus detailed scan                      |
| 86011  | Routine obstetric scan                    |
| 85245  | Routine obstetric scan NOS                |
| 6095   | Seen in antenatal clinic                  |
| 29205  | Serum pregnancy test positive             |
| 70845  | Sinusoidal pattern of fetal heart         |
| 27614  | Triple test                               |
| 39218  | Ultrasonic doppler for fetal heart sounds |
| 19800  | Ultrasound in obstetric diagn.            |
| 12837  | Ultrasound monitoring of early pregnancy  |
| 13965  | Ultra-sound scan - obstetric              |
| 3030   | Urine pregnancy test positive             |
| 2382   | U-S obstetric diagn. scan NOS             |
| 29685  | U-S obstetric scan abnormal               |
| 4797   | U-S obstetric scan normal                 |
| 45963  | U-S scan - fetal abnormality              |

|       |                                |
|-------|--------------------------------|
| 72159 | U-S scan - fetal cephalometry  |
| 42093 | U-S scan - fetal maturity      |
| 41919 | U-S scan - fetal presentation  |
| 41937 | U-S scan - multiple fetus      |
| 35558 | U-S scan - obstetric, diagn.   |
| 68858 | U-S scan -placental localisatn |
| 67047 | Viability scan                 |
| 37147 | Viability US scan              |
| 10306 | Weeks pregnant                 |

**Appendix 12: Outcome Group Combinations**

Within conflicting pairs combinations of outcome groups will be coded as follows:

| <i>Outcome Group combination</i> | <i>Variable Code</i> |
|----------------------------------|----------------------|
| 1 1 (Loss- Loss)                 | 1                    |
| 1 2 (Loss- Delivery)             | 2                    |
| 1 3 (Loss- Unknown)              | 3                    |
| 2 2 (Delivery- Delivery)         | 4                    |
| 2 3 (Delivery- Unknown)          | 5                    |
| 3 3 (Unknown- Unknown)           | 6                    |

**Appendix 13: Read codes for Antenatal scan**

| <b>medcode</b> | <b>read_oxmis_code</b> | <b>Read term</b>                         |
|----------------|------------------------|------------------------------------------|
| 2029           | 62G..00                | Antenatal ultrasound scan                |
| 13965          | 584..13                | Ultra-sound scan - obstetric             |
| 9462           | 584A.00                | Dating/booking US scan                   |
| 2382           | 584Z.00                | U-S obstetric diagn. scan NOS            |
| 13997          | 584G.00                | Nuchal scan                              |
| 42093          | 5846                   | U-S scan - fetal maturity                |
| 37147          | 584B.00                | Viability US scan                        |
| 4797           | 5842                   | U-S obstetric scan normal                |
| 27019          | 5841                   | U-S obstetric scan requested             |
| 9164           | 584..11                | Fetal U-S scan                           |
| 14083          | 62GZ.00                | Antenatal ultrasound scan NOS            |
| 35826          | 62G6.00                | A/N U/S scan normal +/- dates            |
| 14084          | 62GC.00                | Antenatal ultrasound scan at 9-16 weeks  |
| 35558          | 584..12                | U-S scan - obstetric, diagn.             |
| 50546          | 7F26000                | Dating scan                              |
| 29012          | 7F27300                | Nuchal translucency scan                 |
| 27056          | 62GD.00                | Antenatal ultrasound scan at 17-22 weeks |
| 39611          | 62GE.00                | Antenatal ultrasound scan at 22-40 weeks |
| 47415          | 62G5.00                | A/N U/S scan awaited                     |
| 37220          | 62G2.00                | A/N U/S scan offered                     |
| 14085          | 62GB.00                | Antenatal ultrasounds scan at 4-8 weeks  |
| 29685          | 5843                   | U-S obstetric scan abnormal              |
| 72159          | 5845                   | U-S scan - fetal cephalometry            |
| 45963          | 5847                   | U-S scan - fetal abnormality             |
| 27057          | 62G9.00                | A/N U/S scan for ? abnormality           |

|        |         |                                                       |
|--------|---------|-------------------------------------------------------|
| 41919  | 5849    | U-S scan - fetal presentation                         |
| 30885  | 62G4.00 | A/N U/S scan wanted                                   |
| 86011  | 7F26.00 | Routine obstetric scan                                |
| 68858  | 5844    | U-S scan -placental localisatn                        |
| 67047  | 7F26100 | Viability scan                                        |
| 41937  | 5848    | U-S scan - multiple fetus                             |
| 14086  | 62G8.00 | A/N U/S scan abnormal                                 |
| 85992  | 7F27.00 | Non routine obstetric scan for fetal observations     |
| 37221  | 62G7.00 | A/N U/S scan normal +? dates                          |
| 38669  | 5844.11 | Placenta U-S scan                                     |
| 78449  | 7F28.00 | Other non routine obstetric scan                      |
| 100164 | 7F27100 | Detailed structural scan                              |
| 92171  | 7F26200 | Mid trimester scan                                    |
| 95166  | 7F2A111 | Doppler ultrasound scan of uterine artery             |
| 64537  | 62GA.00 | A/N U/S scan for slow growth                          |
| 47116  | 7F28000 | Placental localisation scan                           |
| 85245  | 7F26z00 | Routine obstetric scan NOS                            |
| 102885 | 7F2A011 | Doppler ultrasound scan of umbilical artery           |
| 96343  | 7F26y00 | Other specified routine obstetric scan                |
| 95875  | 7F27z00 | Non routine obstetric scan for fetal observations NOS |
| 85951  | 7F28z00 | Other non routine obstetric scan NOS                  |
| 98261  | 7F27y00 | OS non routine obstetric scan for fetal observations  |
| 95698  | 7F28y00 | Other specified other non routine obstetric scan      |



**Appendix 14: DID Snomed foetal scan codes**

|                                                                                 |           |
|---------------------------------------------------------------------------------|-----------|
| Dating/booking ultrasound scan (procedure)                                      | 169229007 |
| Fetal anatomy study (procedure)                                                 | 271442007 |
| Fetal biophysical profile (procedure)                                           | 21623001  |
| Fetal echocardiography (procedure)                                              | 433235006 |
| Magnetic resonance imaging of multiple pregnancy (procedure)                    | 450825001 |
| Placental localization (procedure)                                              | 164817009 |
| Ultrasonography of multiple pregnancy for fetal anomaly (procedure)             | 445866007 |
| Ultrasonography of multiple pregnancy for fetal nuchal translucency (procedure) | 446810002 |
| Ultrasound scan for amniotic fluid volume (procedure)                           | 241494004 |
| Ultrasound scan for fetal growth (procedure)                                    | 241493005 |

**Appendix 15: Number of episodes with a suitably timed outcome in linked HES data**

| <b>Dataset in which evidence of a suitably timed pregnancy outcome was found.</b> | <b>N pregnancy episodes where evidence of an outcome was found (% of episodes which were eligible for this linked data source)</b> | <b>N pregnancy episodes which were during current registration and UTS follow up</b> | <b>Total number of pregnancy episodes with recorded outcome missing which were eligible for HES linkage to each source</b> |
|-----------------------------------------------------------------------------------|------------------------------------------------------------------------------------------------------------------------------------|--------------------------------------------------------------------------------------|----------------------------------------------------------------------------------------------------------------------------|
| HES Diagnosis (Part of HES APC)                                                   | 24,902 (5.9%)                                                                                                                      | 16,389 (65.8%)                                                                       | 424,375                                                                                                                    |
| HES Maternity (Part of HES APC)                                                   | 163,483 (38.5%)                                                                                                                    | 109,393 (66.9%)                                                                      | 424,375                                                                                                                    |
| HES Procedures (Part of HES APC)                                                  | 201,731 (47.5%)                                                                                                                    | 133,077 (66.0%)                                                                      | 424,375                                                                                                                    |
| HES Episodes (Part of HES APC)                                                    | 185,436 (43.7%)                                                                                                                    | 122,350 (66.0%)                                                                      | 424,375                                                                                                                    |
| HES Outpatient                                                                    | 735 (0.2%)                                                                                                                         | 560 (76.2%)                                                                          | 311,982                                                                                                                    |
| Any HES Source                                                                    | 211,070 (49.7%)                                                                                                                    | 139,084 (65.9%)                                                                      | 424,375                                                                                                                    |

**Appendix 16: Numbers of pregnancy episodes with recorded outcome missing which were within practice UTS follow-up and patient's current registration period that were consistent with applied criteria for each scenario**

| Scenario                                                                                                                                 | Description                                                                                                 | N pregnancy episodes which meet this scenario (% of total episodes with missing outcome) | N pregnancy episodes which <u>only</u> meet this scenario (% of the total episodes with missing outcome) | N pregnancy episodes with evidence of an outcome in linked HES (% of linkage eligible episodes) |
|------------------------------------------------------------------------------------------------------------------------------------------|-------------------------------------------------------------------------------------------------------------|------------------------------------------------------------------------------------------|----------------------------------------------------------------------------------------------------------|-------------------------------------------------------------------------------------------------|
| Denominator                                                                                                                              |                                                                                                             | 475,664                                                                                  | 475,664                                                                                                  | 265,264                                                                                         |
| <i>Problem 1: The women was pregnant at the time of the database record, but the outcome was not captured in CPRD primary care data.</i> |                                                                                                             |                                                                                          |                                                                                                          |                                                                                                 |
| Scenario 1a                                                                                                                              | The pregnancy outcome occurred in hospital or elsewhere and information wasn't fed back to the practice.    | 139,084 (29.2%)                                                                          | 1,825 (0.4%)                                                                                             | 139,084 (52.4%)                                                                                 |
| Scenario 1b                                                                                                                              | The outcome of the pregnancy is recorded in the primary care data but has no event date associated with it. | 475 (0.1%)                                                                               | 28 (0.0%)                                                                                                | 113 (0.0%)                                                                                      |
| Scenario 1c                                                                                                                              | The pregnancy occurred before the patient was registered at the practice or before UTS                      | -                                                                                        | -                                                                                                        | -                                                                                               |

|                                                                                                                                                                     |                                                                                                                                                        |                 |               |                |
|---------------------------------------------------------------------------------------------------------------------------------------------------------------------|--------------------------------------------------------------------------------------------------------------------------------------------------------|-----------------|---------------|----------------|
| <i>Problem 2: The women was pregnant at the time of the database record, but the pregnancy was still ongoing at the end of available follow up in the database.</i> |                                                                                                                                                        |                 |               |                |
| Scenario 2a                                                                                                                                                         | The patient transferred out before the putative end of pregnancy                                                                                       | 117,571 (24.7%) | 34,659 (7.3%) | 52,601 (19.8%) |
| Scenario 2b                                                                                                                                                         | The last collection date of the practice was before the putative end of pregnancy                                                                      | 58,698 (12.3%)  | 20,122 (4.2%) | 21,702 (8.2%)  |
| <i>Problem 3: The patient was not pregnant at the time of the database record.</i>                                                                                  |                                                                                                                                                        |                 |               |                |
| Scenario 3a                                                                                                                                                         | Episode is derived from historical pregnancy information recorded in the first few months after the patient joined the practice                        | 3,875 (0.8%)    | 386 (0.1%)    | 1,271 (0.5%)   |
| Scenario 3b                                                                                                                                                         | Patient asks for advice whilst planning a pregnancy                                                                                                    | 0 (0.0%)        | 0 (0.0%)      | 0 (0.0%)       |
| <i>Problem 4: The pregnancy record belongs to another pregnancy episode in the Register.</i>                                                                        |                                                                                                                                                        |                 |               |                |
| Scenario 4a                                                                                                                                                         | Delay in recording the outcome of a pregnancy, algorithm calculates LMP too late and uncovers records at the beginning of pregnancy creating this PWO. | 35,255 (7.4%)   | 8,265 (1.7%)  | 14,402 (5.4%)  |

|                                                   |                                                                                                                                                    |                 |                 |                |
|---------------------------------------------------|----------------------------------------------------------------------------------------------------------------------------------------------------|-----------------|-----------------|----------------|
| Scenario 4b                                       | The LMP is derived from the data and is wrong resulting in early codes being uncovered creating this episode                                       | 17,110 (3.6%)   | 3,715 (0.8%)    | 6,651 (2.5%)   |
| Scenario 4c                                       | The LMP has been shifted backwards uncovering records at the end of the pregnancy                                                                  | 0 (0.0%)        | 0 (0.0%)        | 0 (0.0%)       |
| Scenario 4d                                       | A code recorded relating to the patient's delivery history is incorrectly identified by the algorithm as a delivery uncovering records at the end. | 219,505 (46.1%) | 109,161 (22.9%) | 65,883 (24.8%) |
| Scenario 4e                                       | The outcome of the pregnancy episode has been misclassified as antenatal                                                                           | 18,222 (3.8%)   | 7,418 (1.6%)    | 3,990 (1.5%)   |
| Pregnancy Episodes which didn't meet any scenario | These pregnancy episodes did not meet the criteria for any identified scenarios.                                                                   | 94,769 (19.9%)  | 0 (0.0%)        | 0 (0.0%)       |

**Appendix 17: Numbers of conflicting pregnancy episodes which were within practice UTS follow-up and patient's current registration period that were consistent with applied criteria for each scenario**

| Scenario                                                                                                     | Description                                                                                                                                                 | N pregnancy pairs<br>(% of total<br>conflicting<br>pregnancy pairs) | N which only fit this<br>scenario<br>(% of the total pairs<br>meeting this<br>scenario) | N of pairs with a<br>linked baby in the<br>MBL (% of the total<br>pairs meeting this<br>scenario) | N pairs with<br>evidence of<br>pregnancy in<br>linked HES |
|--------------------------------------------------------------------------------------------------------------|-------------------------------------------------------------------------------------------------------------------------------------------------------------|---------------------------------------------------------------------|-----------------------------------------------------------------------------------------|---------------------------------------------------------------------------------------------------|-----------------------------------------------------------|
| Denominator                                                                                                  |                                                                                                                                                             | 144,670                                                             | 144,670                                                                                 | 144,670                                                                                           | 93,100                                                    |
| <i>Problem 1: Both pregnancies are true but one is a current pregnancy and one is a historical pregnancy</i> |                                                                                                                                                             |                                                                     |                                                                                         |                                                                                                   |                                                           |
| Scenario 1a                                                                                                  | The GP records a past delivery or loss during a current pregnancy with the same outcome resulting in another episode being created                          | 1,981 (1.4%)                                                        | 317 (0.2%)                                                                              | 1,782 (1.2%)                                                                                      | 1,875 (2.0%)                                              |
| Scenario 1b                                                                                                  | A patient has a record relating to a loss recorded during a pregnancy ending in delivery or vice-versa. Conflicting episodes are generated by the algorithm | 31,526 (21.8%)                                                      | 15,453 (10.7%)                                                                          | 8,275 (5.7%)                                                                                      | 11,410 (12.3%)                                            |
| <i>Problem 2: Both pregnancies are historical</i>                                                            |                                                                                                                                                             |                                                                     |                                                                                         |                                                                                                   |                                                           |

|                                                                                                                                           |                                                                                                                                                                        |               |              |              |              |
|-------------------------------------------------------------------------------------------------------------------------------------------|------------------------------------------------------------------------------------------------------------------------------------------------------------------------|---------------|--------------|--------------|--------------|
| Scenario 2a                                                                                                                               | A patient has information on historical pregnancies recorded with the current date rather than the actual date.                                                        | 12,557 (8.7%) | 0 (0.0%)     | 97 (0.1%)    | 4,309 (4.6%) |
| <i>Problem 3: Both pregnancies are true and current but the gestation of the second pregnancy estimated by the algorithm is too long.</i> |                                                                                                                                                                        |               |              |              |              |
| Scenario 3a                                                                                                                               | The woman has two losses which are >8weeks and <12weeks apart.                                                                                                         | 2,284 (1.6%)  | 3 (0.0%)     | 0 (0.0%)     | 635 (0.7%)   |
| Scenario 3b                                                                                                                               | The woman has two pregnancies close together and the second ends in delivery. If the LMP information is wrong for this pregnancy, then algorithm episodes may overlap. | 13,464 (9.3%) | 2,387 (1.6%) | 1,113 (0.8%) | 4,502 (4.8%) |
| <i>Problem 4: : The pregnancy is true and current but is split into separate episodes by the rules of the algorithm</i>                   |                                                                                                                                                                        |               |              |              |              |
| Scenario 4a                                                                                                                               | The GP records further information about a pregnancy outcome >25 weeks later for deliveries or >8weeks <12 weeks later for losses.                                     | 2,347 (1.6%)  | 183 (0.1%)   | 2,155 (1.5%) | 2,255 (2.4%) |

|             |                                                                                                                                                                                                               |                |                |                |                |
|-------------|---------------------------------------------------------------------------------------------------------------------------------------------------------------------------------------------------------------|----------------|----------------|----------------|----------------|
| Scenario 4b | The GP records further antenatal information after the end of a pregnancy. Conflicting episodes are generated by the algorithm                                                                                | 27,131 (18.8%) | 25,097 (17.3%) | 11,097 (7.7%)  | 11,668 (12.5%) |
| Scenario 4c | The patient has a follow up scan after a pregnancy loss. The scan is recorded in the data as an antenatal scan, a conflicting episode is then generated by the algorithm.                                     | 2,088 (1.4%)   | 0 (0.0%)       | 0 (0.0%)       | 587 (0.6%)     |
| Scenario 4d | The GP records information about a pregnancy but no outcome with >6 weeks between records. If the second episode has gestational information the start may be assigned before the start of the first episode. | 9,911 (6.9%)   | 9,911 (6.9%)   | 0 (0.0%)       | 5,079 (5.5%)   |
| Scenario 4e | The pregnancy dates have been shifted backwards by the rules of the algorithm leaving uncovered records. Conflicting episodes are generated by the algorithm.                                                 | 55,205 (38.2%) | 53,044 (36.7%) | 43,945 (30.4%) | 33,057 (35.5%) |
| None        | These pairs of pregnancies did not meet the criteria for any identified scenarios.                                                                                                                            | 15,650 (10.8%) | -              | 8,921 (6.2%)   | 8,235 (8.8%)   |



**Appendix 18: Number of conflicting episode pairs by outcome combination**

| <b>Outcome Combination</b> | <b>N pairs<br/>(% of total conflicting pairs)</b> |
|----------------------------|---------------------------------------------------|
| two losses                 | 65,826 (26.2%)                                    |
| one loss one delivery      | 73,222 (29.2%)                                    |
| one loss one unknown       | 62,776 (25.0%)                                    |
| two deliveries             | 10,204 (4.1%)                                     |
| one delivery one unknown   | 24,303 (9.7%)                                     |
| two unknowns               | 14,695 (5.9%)                                     |
| Total Pairs                | 251,026 (100%)                                    |
